# Supplementary material
Source: publisher site journal article supplement (https://www.dovepress.com/article/224255)
Supplement: Supplementary file 1 [file get_supplementary_file.php]

# In vitro intestinal uptake and permeability of fluorescently-labelled hyaluronic acid nanogels

Miguel Xavier,<sup>a</sup> Lorena García-Hevia,<sup>a</sup> Isabel R. Amado,<sup>a,b</sup> Lorenzo Pastrana<sup>a</sup> & Catarina Gonçalves<sup>a</sup>

<sup>a</sup> International Iberian Nanotechnology Laboratory, Department of Life Sciences, Nano4Food Unit. Av. Mestre José Veiga s/n, 4715-330, Braga, Portugal.

<sup>b</sup> Department of Food and Analytical Chemistry, Faculty of Sciences, University of Vigo. Campus As Lagoas s/n, 32004, Ourense, Spain.

## Electronic Supplementary Information

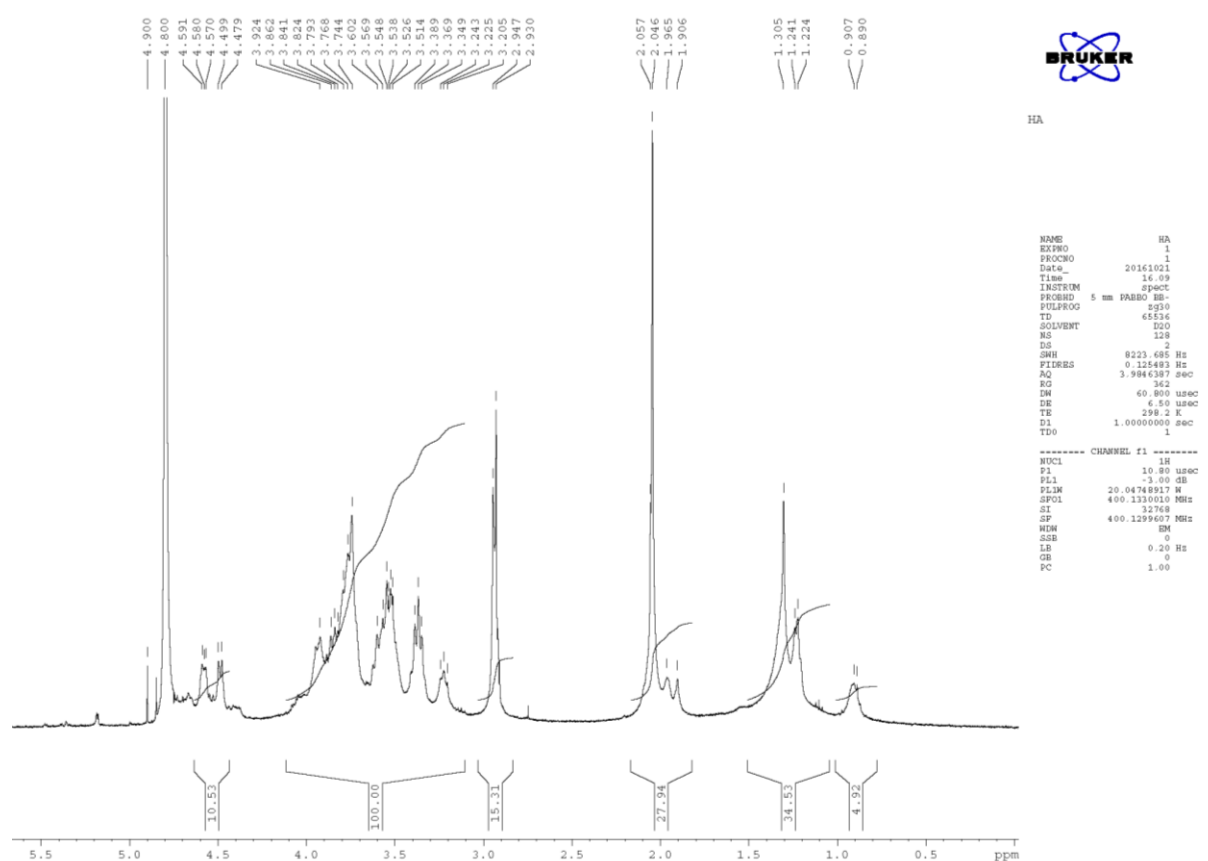

**ESI Figure 1** –  $^1\text{H}$  NMR spectrum of the C16-HyA conjugates dispersed in  $\text{D}_2\text{O}$  at  $10 \text{ mg}\cdot\text{mL}^{-1}$  obtained using a Varian Unity Plus 300 spectrometer operating at 299.94 MHz and 25 °C.

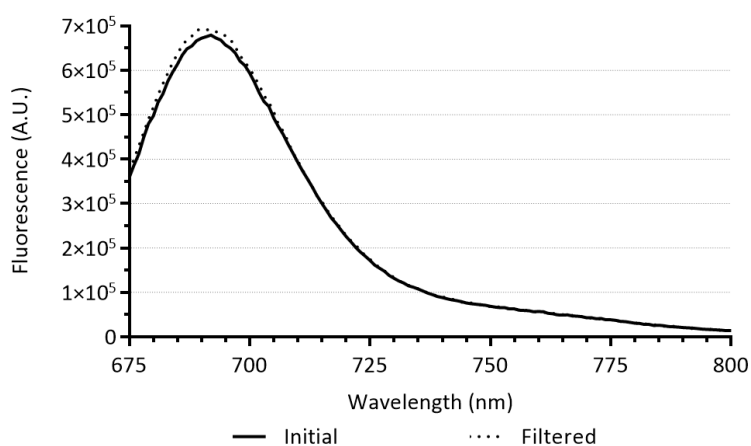

**ESI Figure 2** – Fluorescence emission spectra ( $\lambda_{\text{ex}}=650 \text{ nm}$ ) of the C16-HyA-Cy5.5 conjugates before and after filtration through the  $0.45\text{-}\mu\text{m}$  PVDF syringe filters.

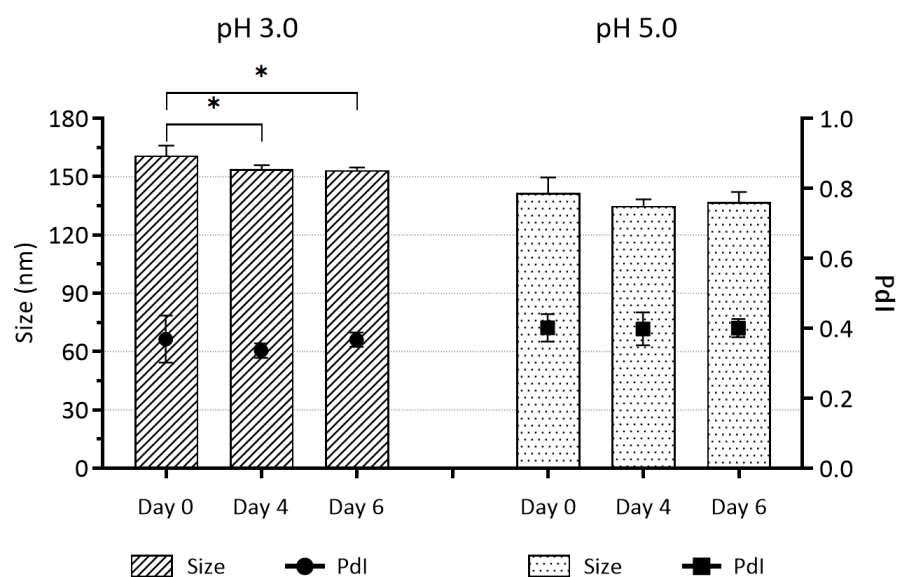

**ESI Figure 3** – Average size and polydispersity index (PDI) of the C16-HyA nanogels at pH 3.0 and 5.0 measured by dynamic light scattering before and after storage for up to 6 days at 4 °C. Values show Mean  $\pm$  SD (N=6; \*p < 0.05 with p-values obtained using a two-way ANOVA with Tukey's post-hoc test).
